1                   **Discovery of a polybrominated aromatic**  
2                   **secondary metabolite from a planctomycete**  
3                   **points at an ambivalent interaction with its**  
4                   **macroalgae host**

5  
6  
7  
8  
9  
10  
11                   Fabian Panter<sup>[a,b]</sup>, Ronald Garcia<sup>[a,b]</sup>, Angela Thewes<sup>[a,b]</sup>, Nestor Zaburanyi<sup>[a,b]</sup>, Boyke Bunk<sup>[b,c]</sup>, Jörg  
12                   Overmann<sup>[b,c]</sup>, Mary Victory Gutierrez<sup>[d]</sup>, Daniel Krug<sup>[a,b]</sup> and Rolf Müller\*<sup>[a,b]</sup>

13  
14  
15                   \* Corresponding author, [rolf.mueller@helmholtz-hips.de](mailto:rolf.mueller@helmholtz-hips.de)

16  
17  
18  
19  
20                   [a] Department of Microbial Natural Products, Helmholtz-Institute for Pharmaceutical Research Saarland (HIPS), Helmholtz  
21                   Centre for Infection Research (HZI) and Department of Pharmacy, Saarland University, Campus E8 1, 66123 Saarbrücken,  
22                   Germany

23                   [b] German Centre for Infection Research (DZIF), Partner Site Hannover–Braunschweig, Germany

24                   [c] Leibniz Institute DSMZ-German Collection of Microorganisms and Cell Cultures, Inhoffenstraße 7B, 3814 Braunschweig,  
25                   Germany

26                   [d] Biology Department, Far Eastern University, Nicanor Reyes St., Sampaloc, Manila, 1008 Metro Manila, Philippines

## 32 Abstract

33 The roles of the majority of bacterial secondary metabolites, especially those from uncommon sources are  
34 yet elusive even though many of these compounds show striking biological activities. To further investigate the  
35 secondary metabolite repertoire of underexploited bacterial families, we chose to analyze a novel representative  
36 of the yet untapped bacterial phylum *Planctomycetes* for the production of secondary metabolites under  
37 laboratory culture conditions. Development of a planctomycetal high density cultivation technique in  
38 combination with high resolution mass spectrometric analysis revealed Planctomycetales strain 10988 to produce  
39 the plant toxin 3,5 dibromo p-anisic acid. This molecule represents the first secondary metabolite reported from  
40 any planctomycete. Genome mining revealed the biosynthetic origin of this doubly brominated secondary  
41 metabolite and a biosynthesis model for the compound was devised. Comparison of the biosynthetic route to  
42 biosynthetic gene clusters responsible for formation of polybrominated small aromatic compounds reveals  
43 evidence for an evolutionary link, while the compound's herbicidal activity points towards an ambivalent role of  
44 the metabolite in the planctomycetal ecosystem.

## 45 1 Introduction

46 Bacterial secondary metabolism has long been a source of chemically diverse and biologically active natural  
47 products.<sup>1,2</sup> In fact, large numbers of biologically active entities have been isolated from extensively screened  
48 phyla such as actinobacteria, firmicutes and proteobacteria.<sup>3-5</sup> To establish alternative sources, natural products  
49 research is increasingly focusing on taxa that have been less exploited to date, but show potential for production  
50 of secondary metabolites according to the presence of secondary metabolite biosynthesis gene clusters (BGCs) in  
51 their genomes.<sup>2</sup> This strategic shift towards new producers increases chances for the discovery of novel bioactive  
52 secondary metabolite scaffolds that are chemically distinct from the scaffolds found in previously screened  
53 bacteria. While it has long been stated that phylogenetically distant species have a more distinct secondary  
54 metabolism, recent comprehensive secondary metabolome studies were able to validate this claim.<sup>6,7</sup>  
55 Accordingly, it is now widely recognized that there is an urgent need to scrutinize novel bacterial taxa, alongside  
56 the use of sensitive mass spectrometry and varied cultivation conditions to unearth novel natural products from  
57 bacterial secondary metabolomes.<sup>8</sup> Planctomycetes represent an underexploited phylum of bacteria in terms of  
58 their secondary metabolite potential.<sup>9</sup> Although planctomycetes have been already discovered in 1924, until now  
59 no secondary metabolite of planctomycetal origin has been reported.<sup>10</sup> This bleak picture is in clear contrast to  
60 previous *in-silico* genome analysis that suggested planctomycetes to contain a significant number of secondary  
61 metabolite biosynthetic gene clusters (BGCs).<sup>9,11</sup> In this work, we describe the first secondary metabolite from  
62 any planctomycete including its structural characterization and biosynthesis, whereas its biological activity sheds  
63 light on the putative ecological role within the planctomycete's natural habitat.

## 64 **2 Results and Discussion**

### 65 **2.1 Cultivation of *Planctomycetales* strain 10988**

66 In order to investigate the biosynthetic capacity of uncommon and underexploited bacteria, we set out to  
67 isolate new strains from marine sediment samples. Our efforts revealed a swarming, rose colored bacterial isolate  
68 that was designated as strain 10988 (see Figure 1).

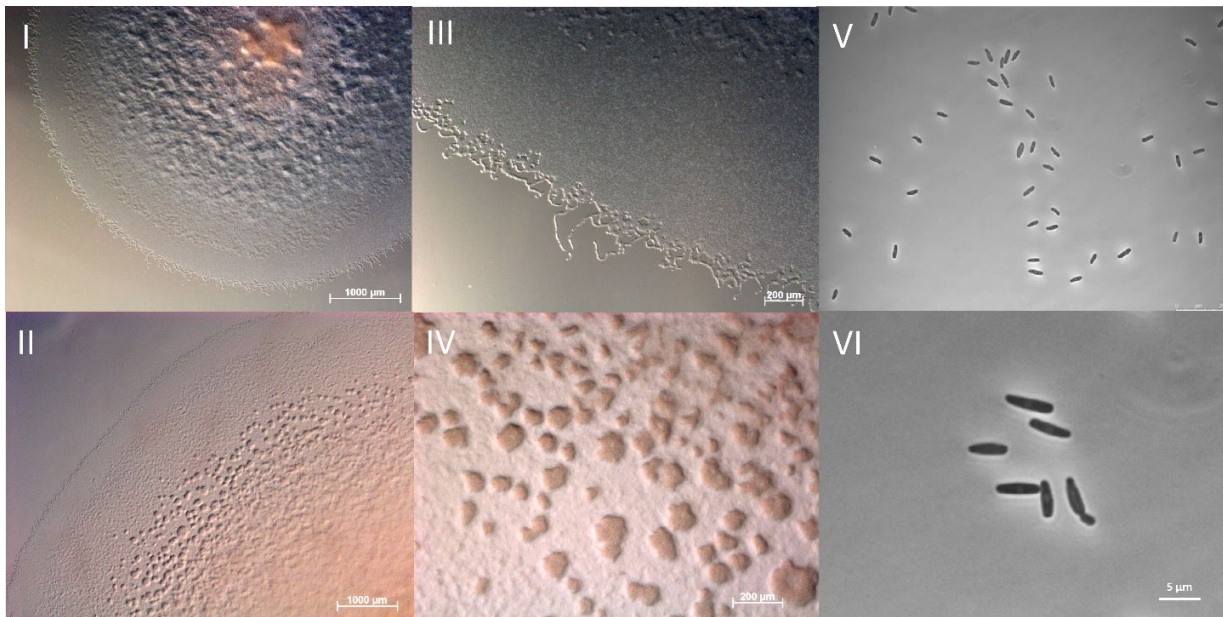

69 **Figure 1.** Growth characteristics of *Planctomycetales* strain 10988 on solid medium displaying swarming (I and III), fruiting  
70 body like aggregate formation (II to IV) and phase contrast microscopy images of single cells from swarm (V) and from fruiting  
71 body like aggregates (VI).

72 16S rRNA-gene based phylogenetic analyses revealed the bacterium to belong to the order *Planctomycetales*,  
73 while being genetically distant from previously characterized planctomycetal genera such as *Thermogutta*,  
74 *Thermostilla*, *Pirellula*, *Rhodopirellula* and *Blastopirellula* (see Figure 2).<sup>9,12-14</sup>

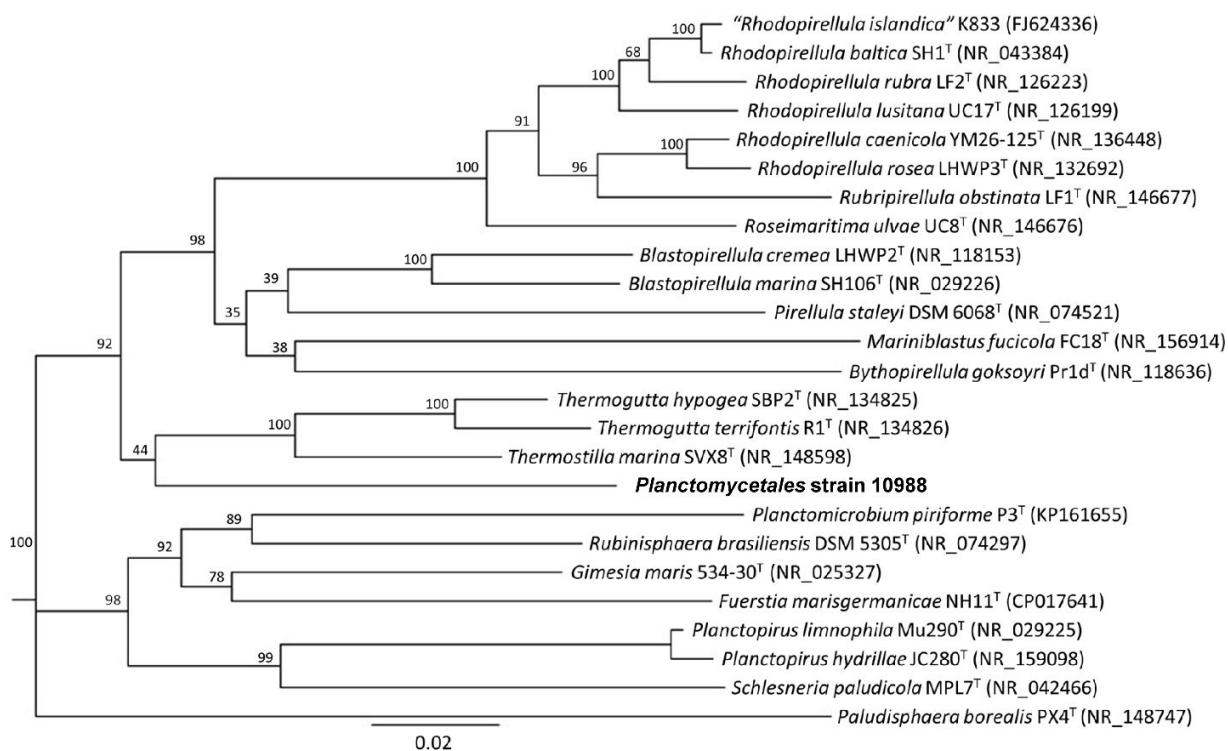

75

76 **Figure 2.** Phylogenetic tree inferred from 16S rRNA gene sequence similarity showing Planctomycetales strain 10988 among  
77 its nearest neighbors in the family Planctomycetaceae. GenBank accession numbers are indicated in parenthesis.  
78 *Paludisphaera borealis* strain PX4<sup>T</sup> was used as outgroup to root the tree. The scale bar indicates nucleotide substitutions per  
79 site.

80 The nearest neighbors of strain 10988 among the *Planctomycetales* are the genera *Thermogutta* and  
81 *Thermostilla*, both of which are thermophilic as well as anaerobic or microaerophilic. However, strain 10988  
82 showed very different characteristics. It does not only display optimum growth at 24 to 37 °C, but it also grows  
83 aerobically. These findings agree with our 16S rDNA gene classification attempt, which classified strain 10988 as  
84 only distantly related to all characterized *Planctomycetes*. We thus sought to evaluate its secondary metabolome  
85 as a potential source for new natural products. Although *Planctomycetes* have been continuously studied since  
86 the late 1980s and *Planctomycetes* have shown to possess cellular features completely distinct from other  
87 prokaryotes, little has been done to investigate the planctomycetal secondary metabolome.<sup>15,16</sup> One of the key  
88 limiting factors that need to be overcome in order to uncover planctomycetal secondary metabolism is the  
89 requirement to develop suitable cultivation techniques first. While there has been some success with cultivation  
90 of freshwater *Planctomycetes*, cultivation of marine species such as strain 10988 turned out to be challenging.<sup>17</sup>  
91 Cultivation of strain 10988 showed that it is an obligate halophile, as it did not grow in absence of sea salts. The  
92 halophilicity of the strain is underpinned by an ectoine biosynthesis gene cluster present in genome of strain  
93 10988 that serves as a means to counterbalance the osmotic stress exerted by sea water brine on the cell.  
94 Furthermore, the strain depends on surface adsorption for efficient growth which is exemplified by its enhanced  
95 growth in early stages if cellulose powders are added to the medium. As these fine filter paper pieces turn to rose  
96 color before the medium in the shake flask contains a significant number of suspended cells, the bacterium seems  
97 to preferentially colonize surfaces before dispersing into suspension in a shake flask (supporting information).

98 This finding is well in line with planctomycetal growth in nature that occurs in parts fixed to the surfaces of  
99 macroalgae.<sup>9</sup> The slow growth of this isolate in combination with initially low secondary metabolite production  
100 rates – as judged by LC-MS analysis - led us to devise a fermenter based cultivation to obtain increased secondary  
101 metabolite yields that could not be achieved in shake flask cultivations. As a means to stimulate productivity of  
102 the planctomycetal strain for secondary metabolite isolation, we added adsorber resin to shake flask cultures.  
103 This should circumvent productivity limitations arising from feedback inhibition mechanisms.<sup>18</sup> However, addition  
104 of adsorber resin led to complete suppression of planctomycetal growth unless the culture was inoculated with a  
105 high concentration of actively growing cells. When strain 10988 was grown in absence of adsorber resin,  
106 inoculation of liquid cultures with a very low concentration of live cells was sufficient to stimulate planctomycetal  
107 growth. The most probable explanation for this phenomenon is that the presence of adsorber resin in low density  
108 cultures masks certain quorum sensing signals by binding them, inhibiting cooperative growth of planctomycetes.  
109 While quorum sensing has been linked to different effects such as the inhibition of biofilm formation or virulence,  
110 a quorum sensing signal that increases or stalls cell division speed has not been described yet.<sup>19</sup> As a result, in  
111 order to avoid lack of growth or unnecessarily lengthy lag phases in planctomycetal fermentations in larger scale  
112 production cultures, adsorber resin addition was performed several days post inoculation of the respective  
113 fermenter. In analytical scale shake flask cultivations, the effect of adding resin directly could be mitigated by  
114 inoculation of the cultures with a higher concentration of live cells.

## 2.2 Discovery of 3,5-dibromo p-anisic acid

115 To assess the secondary metabolome of planctomycetal strain 10988, methanolic extracts of the strain's  
116 culture supplemented with adsorber resin were prepared and compared to methanolic extracts of the  
117 corresponding medium ("blank" sample) to obtain an overview about its secondary metabolome. The bacterial  
118 extract as well as the blank were subjected to high-resolution LC-MS analysis using a reverse-phase UPLC-  
119 coupled qTOF setup (supporting information). This analysis revealed an intriguing signal presenting a  
120 monoisotopic mass of 308.873 Da  $[M+H]^+$  ( $C_8H_6Br_2O_3$ ,  $\Delta m/z = 6$  ppm) and an isotope pattern that pointed  
121 towards double bromination.<sup>20</sup> Maximum cell density as well as the production rate of this doubly brominated  
122 compound remained limiting for material supply in shake flask cultures even after media optimization  
123 (supporting information). We therefore developed a method to grow strain 10988 in a fermenter which allowed  
124 to purify the candidate compound by semi-preparative HPLC (supporting information).

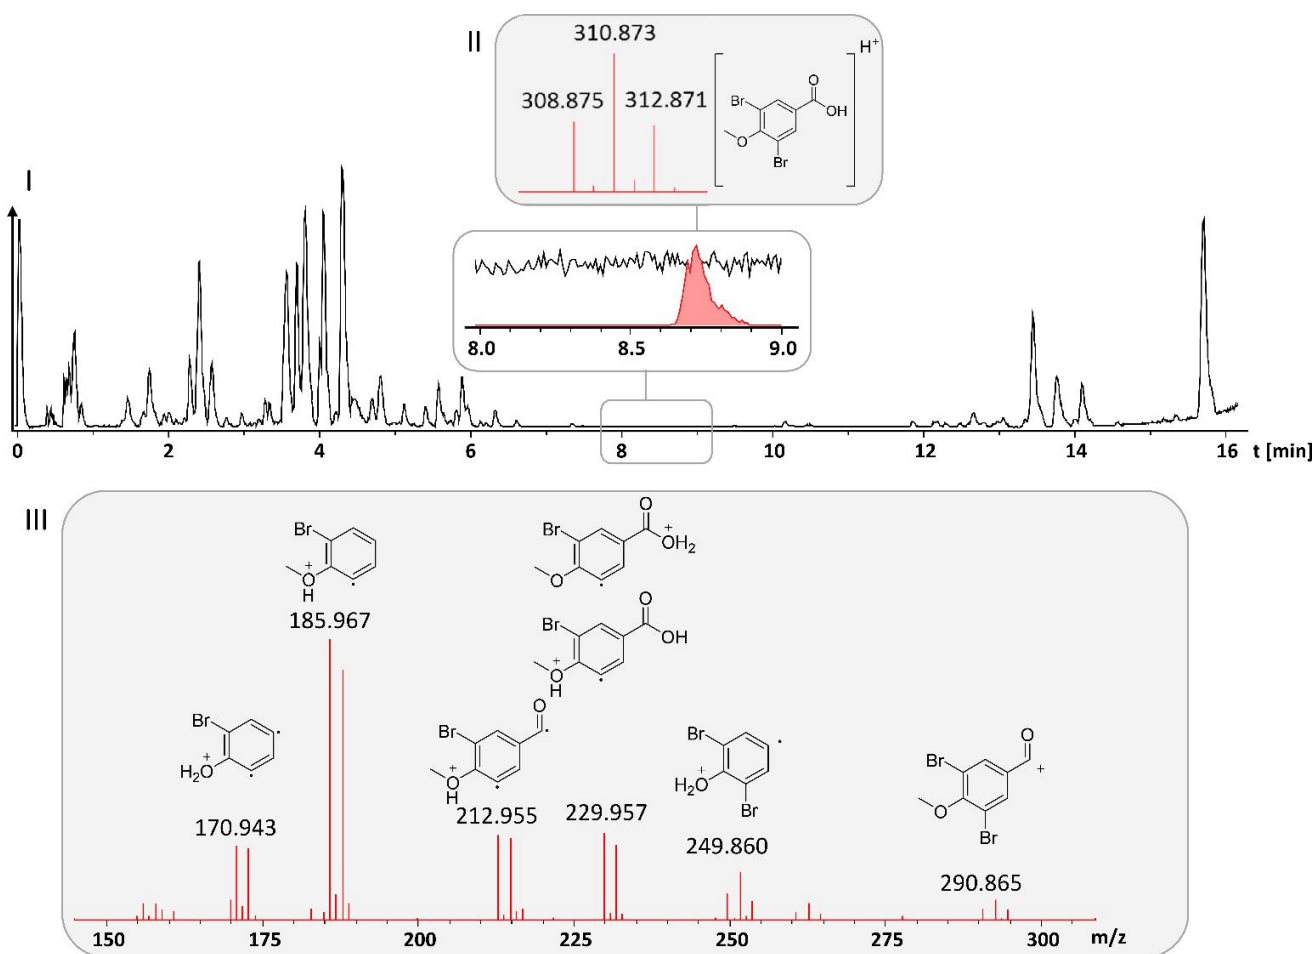

125

126 **Figure 3.** I) LC-MS chromatogram of *Planctomycetales* strain 10988 with magnification of the MS signal for 3,5 dibromo *p*-  
127 anisic acid (**1**) II) Corresponding MS spectrum and structure formula of **1** III) MS<sup>2</sup> spectrum of **1** and putative product ions  
128 formed in MS<sup>2</sup> fragmentation.

129 According to molecular formula calculation the molecule possesses 6 hydrogen atoms. As the <sup>1</sup>H NMR  
130 spectrum contains only 2 singlet signals, the molecule has to be highly symmetrical. One of the signals  
131 representing 2 protons has a strong downfield shift of 8.11 ppm indicating a heavily electron deficient symmetrical  
132 aromatic system while the other singlet signal representing 3 protons is characteristic for an oxygen-linked methyl  
133 group. The <sup>13</sup>C shift of the corresponding methyl group indicates its connection to the phenolic oxygen of the  
134 molecule and not to the carboxylic acid (supporting information). This is further supported by the fact that the  
135 tandem MS spectra show a strong water loss as expected from free carboxylic acid moieties, while we did not  
136 observe neutral loss of methanol in tandem MS experiments (Figure 3). This neutral loss would be expected if the  
137 molecule contained a methyl ester. The double brominated compound produced by 10988 was therefore  
138 determined to be 3,5 dibromo-*p*-anisic acid (**1**), which could be later confirmed using synthetic standard material.  
139  
140

## 2.3 Biosynthesis of 3,5-dibromo p-anisic acid

141 In order to identify the biosynthetic origin of **1**, we determined the complete genome of *Planctomycetales*  
142 strain 10988 using PacBio long read sequencing technology (supporting information). Genome assembly resulted  
143 in a single circular bacterial chromosome of 6.6 Mbp with a total GC content of 50.4% (GenBank accession number  
144 XXX). AntiSMASH analysis of the bacterial genome annotated 3 terpene biosynthetic gene clusters (BGCs), an  
145 ectoine BGC, a cluster for lassopeptide biosynthesis and a PKS type III BGC.<sup>21</sup> Contrary to earlier genome mining  
146 results from planctomycetes, the genome of strain 10988 does not encode any multimodular secondary  
147 metabolite pathways in its genome.<sup>11,22</sup> Since our newly elucidated secondary metabolite is likely not produced  
148 by a multimodular megasynthase, the biosynthesis gene cluster predictors run by antiSMASH are in this case  
149 unsuitable to annotate the corresponding biosynthesis pathway, which possibly consists of a set of 'stand-alone'  
150 enzymes.<sup>21</sup> We therefore searched the obtained genome for flavin dependent halogenase enzymes, as most  
151 region selective bromination or chlorination reactions on aromatic systems are catalyzed by this protein family in  
152 nature.<sup>23,24</sup> The flavoprotein showing highest homology to halogenating enzymes was named BaaB. It was found  
153 encoded adjacent to - and putatively on the same mRNA strand as - a chorismate lyase-like protein termed BaaA.  
154 This protein could plausibly deliver the precursor para-hydroxy benzoic acid from the cellular chorismic acid pool  
155 (Figure 4).<sup>25</sup> Homology modelling of the two proteins on the protein fold recognition server Phyre2 supports this  
156 finding, as both proteins involved in biosynthesis of **1** are correctly mapped onto the expected protein families.<sup>26</sup>  
157 Unfortunately, and despite serious efforts we were unable to develop methods to genetically manipulate the  
158 planctomycetal strain and we were thus unable to further validate our hypothesis by an inactivation mutant of  
159 the *baaA* and *baaB* locus. The mechanism of UbiC-like chorismate lyases such as BaaA is less studied in comparison  
160 to the mechanism of chorismate mutases. Chorismate mutase reactions consist of an electrocyclic 6 electron  
161 rearrangement reaction that leads to prephenate formation (Figure 4).<sup>25</sup> Chorismate lyase enzymes like BaaA use  
162 a closely related electrocyclic 6 electron rearrangement reaction that removes pyruvate from chorismate to form  
163 p-hydroxy benzoic acid.<sup>27</sup> At this point we cannot differentiate whether p-hydroxybenzoic acid is methylated  
164 to p-anisic acid first or if methyl transfer occurs after double bromination of p-hydroxybenzoic acid by the  
165 brominase enzyme BaaB. In order to finish biosynthesis of **1** after the action of BaaA and BaaB, an SAM dependent  
166 O-methyl transferase (BaaC) is needed that transforms **2** into **1**. When analyzing the genetic locus encoding BaaA  
167 and BaaB we did not find such an enzyme, meaning BaaC is encoded in a different genetic locus. The fact that the  
168 *baaA* and *baaB* genes are encoded adjacently in the genome, while the corresponding methyl transferase *baaC*  
169 is encoded in a different location may indicate that dibromo p-hydroxybenzoic acid is produced first and  
170 subsequently methylated. It is worth noting that we could not identify either of the possible intermediates *via* LC-  
171 MS from the 10988 strain extracts. As BaaB is the only halogenase enzyme encoded in the *baa* BGC, it is certainly  
172 responsible for 3,5 dibromination of the aromatic moiety. As both positions that are brominated are chemically  
173 equivalent it is not surprising that both halogenations are performed by the same enzyme. Furthermore, we  
174 observe strict specificity of BaaB for bromine as no chlorinated or mixed brominated and chlorinated anisic acid

175 derivatives can be identified in the fermentation broth. Thus, BaaB is either unable to bind chloride anions instead  
176 of bromide anions due to a difference in binding cavity size, or the redox potential of BaaB is not sufficient to  
177 oxidize chloride anions but is sufficient to oxidize bromide ions to an activated species. Still, BaaB is not the only  
178 such enzyme unable to process chlorine, as the brominase Bmp5 from *Pseudoalteromonas* strains involved in  
179 biosynthesis of polybrominated phenols is also specific for bromine over chlorine.<sup>28</sup> The architectures of the  
180 responsible loci producing polybrominated biphenylic secondary metabolites show remarkable similarity to the  
181 Baa operon even though the host organisms are phylogenetically very distant. While Bmp5-like proteins from *P.*  
182 *luteoviolacea* 2ta16 and *P. phenolica* O-BC30 are very similar as they share 96% homology, their similarity to BaaB  
183 remains around 44%. This finding is readily explained as *Pseudoalteromonads* and *Planctomycetes* are  
184 phylogenetically far apart and BaaB only catalyzes meta-position bromination, while Bmp5 also catalyzes ipso  
185 substitution of CO<sub>2</sub> at the aromatic core. This reaction removes the carboxylic acid and the phenols are not  
186 methylated afterwards.<sup>29,30</sup> Furthermore, in biosynthesis of polybrominated biphenyl ethers in  
187 *Pseudoalteromonads*, an additional enzyme called Bmp7 uses phenolic coupling reactions to form biphenyl  
188 structures that do not exist in our planctomyces strain, as the *baa* gene cluster in strain 10988 does not possess  
189 the corresponding CYP P450 enzymes.<sup>30</sup> The absence of CYP enzymes in the planctomycetal BGC explains why  
190 the planctomycete only synthesizes monocyclic polybrominated aromatic compounds, as it lacks the CYP enzyme  
191 required to perform phenol couplings leading to the formation of biphenylic compounds.<sup>30,31</sup>  
192



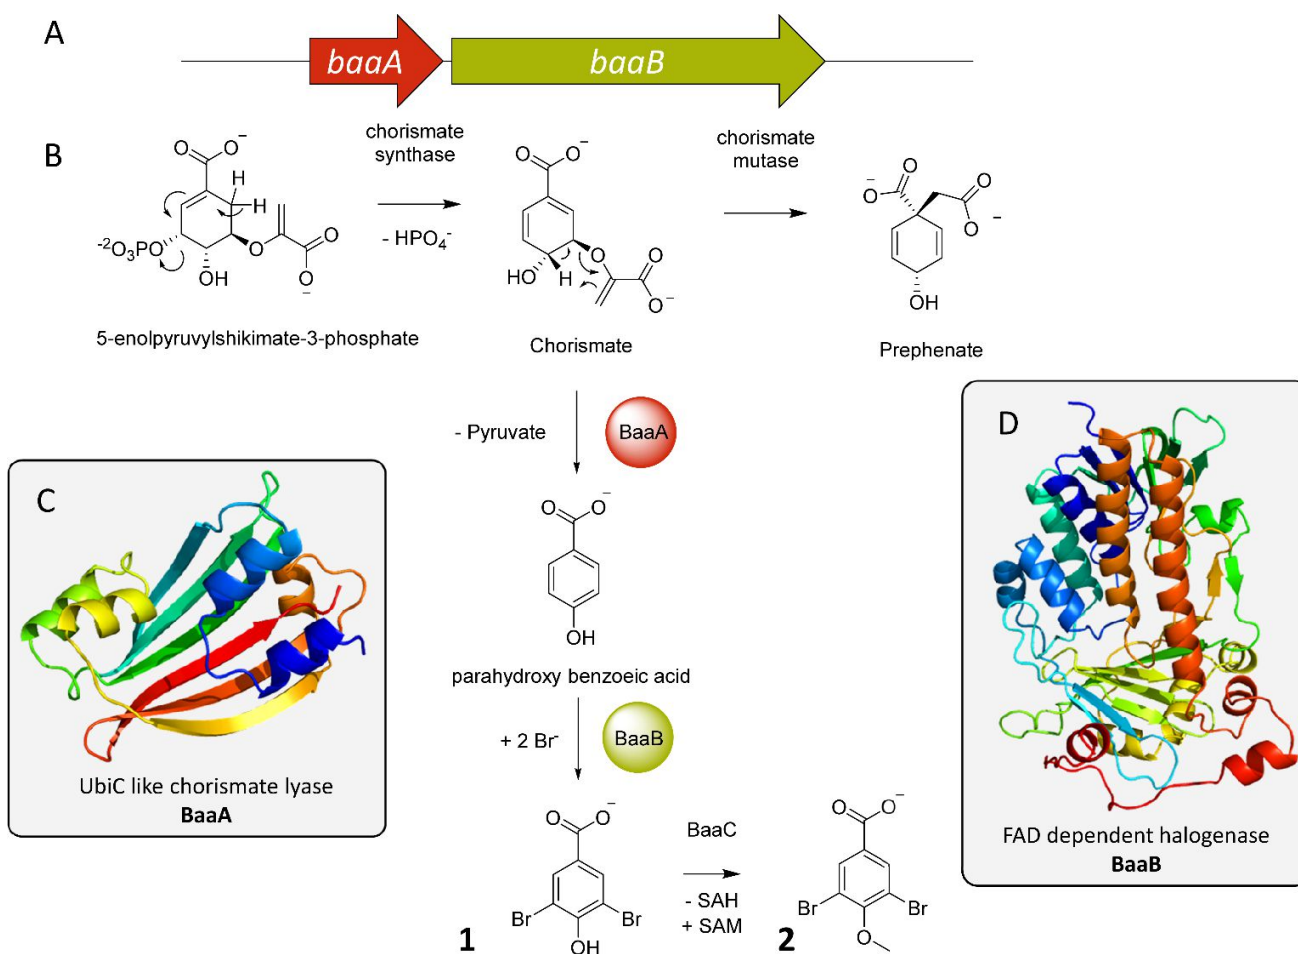

193

194 **Figure 4.** A) Gene cluster for 3,5 dibromo *p*-anisic acid (**1**) biosynthesis B) Proposed model for biosynthesis of **1** including the  
195 non-methylated precursor **2** C) Phyre2 based homology model for the chorismate lyase BaaA D) Phyre2 based homology model  
196 for the brominase BaaB.

197 As shown in Figure 4, in order to finish biosynthesis of **1**, the formerly mentioned oxygen-methyl transferase  
198 BaaC is required that transfers a methyl group and thus forms the methoxy group in **1**. The corresponding oxygen-  
199 methyl transferase responsible for methyl transfer to the phenolic oxygen of the precursor compound is not  
200 clustered with the genes responsible for *p*-anisic acid production. Although there are some candidate sequences  
201 for the BaaC protein, it is impossible to exactly pinpoint the methyl transferase in the 10988 genome responsible  
202 for methylation of **2** due to our inability to perform directed mutagenesis with the strain. Nevertheless, following  
203 blast analysis of the 10988 genome for homologues to the Stk protein from stigmatellin biosynthesis in *S.*  
204 *aurantiaca* (NCBI protein acc. Nr. CAD19094.1) and UbiG from *Escherichia coli* K12 (NCBI protein acc. Nr.  
205 BAA16049.1) that both catalyze methyl transfer to an aromatic hydroxyl group, we obtained 8 candidate  
206 sequences.<sup>32,33</sup> These candidate genes for the enzyme BaaC, which show similarity to both aforementioned  
207 enzymes, can thus be assumed to catalyze reactions such as the transformation of **2** to **1**.

208

209

## 2.4 Bioactivity evaluation of **1** and its analogs

210 Due to the double bromination of **1**, its biosynthesis is costly to the strain in terms of energy and resources.  
211 Therefore, **1** can be plausibly expected to confer a competitive advantage to strain 10988 in its environment. To  
212 evaluate this biological role of **1** we set out to profile its bioactivity as well as the bioactivity of its biological  
213 precursor **2** and its isomer Methyl 3,5 p-hydroxy benzoic acid (**3**). The compounds **2** and **3** that cannot be  
214 obtained from the planctomycetal culture broth are commercially available.

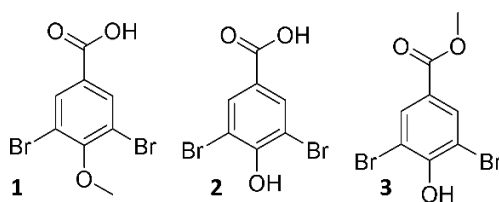

216 **Scheme 1.** The natural product 3,5 dibromo p-anisic acid (**1**), its putative biological precursor 3,5 dibromo p-hydroxybenzoic  
217 acid and the natural product analog Methyl-3,5 dibromo p-hydroxybenzoate (**3**)

218 The planctomycetal natural product **1**, its precursor **2** and its analog **3** were tested in an antibiotics screening  
219 against the bacterial pathogens *C. freundii*, *A. baumannii*, *E. coli*, *M. smegmatis*, *S. aureus*, *P. aeruginosa*, *B. subtilis*  
220 and *M. luteus*, the yeasts *C. albicans* and *P. anomala* as well as the filamentous fungus *M. hiemalis*. The  
221 compounds did not display any inhibition of these microbial indicator strains at concentrations up to 64 µg/ml.  
222 To evaluate cytotoxicity we tested **1**, **2** and **3** in a cell line cytotoxicity assay. This assay revealed both methylated  
223 compounds (**1** and **3**) to display moderate cytotoxicity to the human cervical carcinoma cell line KB3.1. While **1**  
224 and **3** showed an IC<sub>50</sub> value of 60 µg/ml, no cytotoxicity was found for the free acid **2** up to 300 µg/ml. To assay  
225 herbicidal activity of p-methoxy dibromo benzoic acid as well as its precursor and isomer we tested the  
226 compound's activity on the germination of *Agrostis stolonifera* penncross. IC<sub>50</sub> values for seed germination  
227 inhibition were determined to be 32 µg/ml for **1**, 64 µg/ml for **2** and 16 µg/ml for **3**. The fully decorated methoxy  
228 derivative **1** shows higher biological activity than its precursor **2** while the non-natural methyl ester derivative **3**  
229 shows the best anti-germination activity in the *A. stolonifera* germination assay (supporting information). As  
230 compound **1** shows no significant antibacterial activity or mammalian cell cytotoxicity but displays moderate  
231 phytotoxicity and as **1** is likely released to the marine environment, we assume its role as a putative algal toxin  
232 (supporting information).

233

234

235

236

237

## 2.5 On the potential biological role of **1**

238 Many planctomycetes live in close association with macroalgae which they cover almost completely.<sup>34</sup> Given  
239 that the strain 10988 was isolated from a marine sediment, the strain is likely associated with marine algae in its  
240 natural habitat. The exact mode of interaction between the planctomycetes and the macroalgae has yet to be  
241 determined. Still, the high abundance of planctomycetes on algal species, which can reach up to 50 % of the algal  
242 microbiome, indicates that these bacteria are significant interaction partners for the algae.<sup>34</sup> One hypothesis  
243 considers the algae as a food source for planctomycetes, since they are able to utilize uncommon sugars such as  
244 rhamnose and fucose contained in algal biomass. In our case, strain 10988 – like other planctomycetes – was able  
245 to grow on uncommon sugars such as galactose, mannose, lactose, sucrose, maltose raffinose, xylose and  
246 rhamnose (supporting information, Figure S2), indicating that this nutritional option could apply to strain 10988.  
247 <sup>11</sup> As on the other hand, the planctomyces bacterium possesses the ability to produce the plant toxin 3,5 dibromo  
248 p-anisic acid, whose production seems to be tightly controlled as judged by the low production titers under  
249 laboratory conditions, we reason that an ambivalent interaction model might take place between planctomycetes  
250 and their plant hosts. The planctomycetes strains probably live on the algal surface and modulate the local  
251 microbial community until they sense the algal species they live on is weakening. This might trigger expression of  
252 said plant toxin to kill and decay this part of the algae and the bacterium would subsequently move on to colonize  
253 different algae. Similar ‘Jeekyll and Hyde’ behavior, meaning the ability to switch between commensalism and  
254 symbiosis, comparable to planctomycetal colonization of algae, and a virulent state that is hostile to its host  
255 organism has been described for the human pathogen *C. albicans*.<sup>35</sup> The ability of strain 10988 to produce a plant  
256 toxin as a bacterium associated to macroscopic plants can be seen as a strong hint that the bacterium adopts such  
257 a strategy.

## 258 **3 Conclusion**

259 In this work we describe the cultivation of a new marine planctomycete that is genetically distant from all  
260 planctomycetes known to date, and reveal *Planctomycetales* strain 10988 as producer of a dibrominated  
261 secondary metabolite. Isolation of this secondary metabolite required a stirred tank reactor setting and optimized  
262 medium and culture conditions. Subsequent structure elucidation of **1** by NMR revealed an intriguing structure  
263 and thus sparked interest in the biosynthetic origin and ecological role of the compound. We were able to pinpoint  
264 the core biosynthesis genes *baaA* and *baaB* that can accomplish the core structure of **1**. Investigation of the  
265 bioactivity of **1** as well as the bioactivity of its isomer **3** and putative precursor **2** showed that this compound class  
266 displays herbicidal activity in *A. stolonifera* penncross germination assays, leading us to hypothesize on a biological  
267 role of this compound in the life cycle of the algal symbiont *Planctomycetales* strain 10988. In conclusion, we  
268 contribute to the understanding of the biogenesis of small polyhalogenated compounds in marine bacteria,

269 whereas it remains astonishing to what extent such polybrominated aromatic substances are apparently released  
270 into the ecosystem from biological instead of anthropogenic sources.

271 This study also identifies planctomycetes as an underexploited source of biologically active secondary  
272 metabolites, as **1** to the best of our knowledge is the first natural product described from this bacterial taxon.  
273 However, we would like to point out that previous studies may have overestimated the genome encoded  
274 secondary metabolite diversity of planctomycetes as a group, since strain 10988 under study here did not show  
275 the presence of any multimodular megasynthetase.<sup>11,22</sup> Even though strain 10988 shows some BGCs, especially  
276 BGCs linked to terpene biosynthesis, megasynthase containing BGCs are often considered as benchmark indicators  
277 for secondary metabolite production capability.<sup>2</sup> On the other hand, the example presented here shows how  
278 important it is to evaluate new taxa on the metabolomics stage, since metabolites of the type described here are  
279 easily missed by genome mining. Thus, the overall potential of planctomycetes awaits further investigation. While  
280 growing these bacteria under laboratory conditions may be tedious and non-trivial, devising methods for their  
281 cultivation is a valuable tool to tap into the planctomycetal secondary metabolite space. The discovery of  
282 polybrominated compounds in strain 10988 is well in line with both the observation that this bacterium is an  
283 obligate halophile and reminiscent of the strain's marine origin. The isolated and characterized natural product  
284 3,5 dibromo p-anisic acid shows that Nature, especially the marine microbial community is able to biosynthesize  
285 polyhalogenated small aromatic compounds that look like anthropogenic products of chemical synthesis.

286

## 287 **Acknowledgement**

288 The authors would like to thank Anja Paluczak and Viktoria Schmitt for the herbicidal and antimicrobial assays  
289 with 3,5 dibromo p-anisic acid and its analogs. We thank Cathrin Spröer for genome sequencing and Simone  
290 Severitt and Nicole Heyer for excellent technical assistance.

291

## 292 **Supporting Information**

293 An in detail description of the planctomyces strain, all utilized fermentation protocols, *in silico* analyzes on  
294 gene and protein level as well as all relevant NMR data for structure elucidation are available free of charge via  
295 the Internet at BioRxiv.org.

296

## 297 **Corresponding Author**

298 \* Prof. Dr. Rolf Müller, [rolf.mueller@helmholtz-hips.de](mailto:rolf.mueller@helmholtz-hips.de)

## 4 References

- (1) Newman, D. J.; Cragg, G. M. Natural Products as Sources of New Drugs from 1981 to 2014. *J. Nat. Prod.* **2016**, *79*, 629–661, DOI: 10.1021/acs.jnatprod.5b01055.
- (2) Cimermancic, P.; Medema, M. H.; Claesen, J.; Kurita, K.; Wieland Brown, Laura C; Mavrommatis, K.; Pati, A.; Godfrey, P. A.; Koehrsen, M.; Clardy, J. *et al.* Insights into secondary metabolism from a global analysis of prokaryotic biosynthetic gene clusters. *Cell* **2014**, *158*, 412–421, DOI: 10.1016/j.cell.2014.06.034.
- (3) Mondol, M. A. M.; Shin, H. J.; Islam, M. T. Diversity of secondary metabolites from marine bacillus species: Chemistry and biological activity. *Mar. Drugs* **2013**, *11*, 2846–2872, DOI: 10.3390/md11082846.
- (4) Wenzel, S. C.; Müller, R. Myxobacteria--'microbial factories' for the production of bioactive secondary metabolites. *Mol. Biosyst.* **2009**, *5*, 567–574, DOI: 10.1039/b901287g.
- (5) Hug, J. J.; Bader, C. D.; Remškar, M.; Cirnski, K.; Müller, R. Concepts and Methods to Access Novel Antibiotics from Actinomycetes. *Antibiotics* **2018**, *7*, 44, DOI: 10.3390/antibiotics7020044.
- (6) Medema, M. H.; Cimermancic, P.; Sali, A.; Takano, E.; Fischbach, M. A. A Systematic Computational Analysis of Biosynthetic Gene Cluster Evolution: Lessons for Engineering Biosynthesis. *PLoS Comput. Biol.* **2014**, *10*, e1004016, DOI: 10.1371/journal.pcbi.1004016.
- (7) Hoffmann, T.; Krug, D.; Bozkurt, N.; Duddela, S.; Jansen, R.; Garcia, R.; Gerth, K.; Steinmetz, H.; Müller, R. Correlating chemical diversity with taxonomic distance for discovery of natural products in myxobacteria. *Nat. Commun.* **2018**, *9*, 803, DOI: 10.1038/s41467-018-03184-1.
- (8) Clardy, J.; Fischbach, M. A.; Walsh, C. T. New antibiotics from bacterial natural products. *Nat. Biotechnol.* **2006**, *24*, 1541–1550, DOI: 10.1038/nbt1266.
- (9) Wiegand, S.; Jogler, M.; Jogler, C. On the maverick Planctomycetes. *FEMS microbiology reviews* **2018**, *42*, 739–760, DOI: 10.1093/femsre/fuy029.
- (10) Gimesi, N. I: *Planctomyces bekefii* Gim. nov. gen. et sp. *Hydrobiologiai Tanulmányok (hydrobiological studies)*, 1924.

- (11) Jeske, O.; Jogler, M.; Petersen, J.; Sikorski, J.; Jogler, C. From genome mining to phenotypic microarrays: Planctomycetes as source for novel bioactive molecules. *Int. J. Gen. Mol. Microbiol.* **2013**, *104*, 551–567, DOI: 10.1007/s10482-013-0007-1.
- (12) Gupta, R. S.; Bhandari, V.; Naushad, H. S. Molecular Signatures for the PVC Clade (Planctomycetes, Verrucomicrobia, Chlamydiae, and Lentisphaerae) of Bacteria Provide Insights into Their Evolutionary Relationships. *Frontiers in microbiology* **2012**, *3*, 327, DOI: 10.3389/fmicb.2012.00327.
- (13) Slobodkina, G. B.; Kovaleva, O. L.; Miroshnichenko, M. L.; Slobodkin, A. I.; Kolganova, T. V.; Novikov, A. A.; van Heerden, E.; Bonch-Osmolovskaya, E. A. *Thermogutta terrifontis* gen. nov., sp. nov. and *Thermogutta hypogea* sp. nov., thermophilic anaerobic representatives of the phylum Planctomycetes. *International Journal of Systematic and Evolutionary Microbiology* **2015**, *65*, 760–765, DOI: 10.1099/ijs.0.000009.
- (14) Slobodkina, G. B.; Panteleeva, A. N.; Beskorovaynaya, D. A.; Bonch-Osmolovskaya, E. A.; Slobodkin, A. I. *Thermostilla marina* gen. nov., sp. nov., a thermophilic, facultatively anaerobic planctomycete isolated from a shallow submarine hydrothermal vent. *International Journal of Systematic and Evolutionary Microbiology* **2016**, *66*, 633–638, DOI: 10.1099/ijsem.0.000767.
- (15) Schlesner, H.; Hirsch, P. Rejection of the Genus Name *Pirella* for Pear-Shaped Budding Bacteria and Proposal to Create the Genus *Pirellula* gen. nov. *Int J Syst Bacteriol* **1987**, *37*, 441, DOI: 10.1099/00207713-37-4-441.
- (16) Boedeker, C.; Schüler, M.; Reintjes, G.; Jeske, O.; van Teeseling, M. C. F.; Jogler, M.; Rast, P.; Borchert, D.; Devos, D. P.; Kucklick, M. *et al.* Determining the bacterial cell biology of Planctomycetes. *Nature communications* **2017**, *8*, 14853, DOI: 10.1038/ncomms14853.
- (17) Jeske, O.; Surup, F.; Ketteniss, M.; Rast, P.; Forster, B.; Jogler, M.; Wink, J.; Jogler, C. Developing Techniques for the Utilization of Planctomycetes As Producers of Bioactive Molecules. *Front. Microbiol.* **2016**, *7*, 1242, DOI: 10.3389/fmicb.2016.01242.
- (18) Phillips, T.; Chase, M.; Wagner, S.; Renzi, C.; Powell, M.; DeAngelo, J.; Michels, P. Use of in situ solid-phase adsorption in microbial natural product fermentation development. *Journal of Industrial Microbiology & Biotechnology* **2013**, *40*, 411–425, DOI: 10.1007/s10295-013-1247-9.
- (19) Whiteley, M.; Diggle, S. P.; Greenberg, E. P. Progress in and promise of bacterial quorum sensing research. *Nature* **2017**, *551*, 313–320, DOI: 10.1038/nature24624.

- (20) Meusel, M.; Hufsky, F.; Panter, F.; Krug, D.; Müller, R.; Böcker, S. Predicting the presence of uncommon elements in unknown biomolecules from isotope patterns. *Anal. Chem.* **2016**, *88*, 7556–7566, DOI: 10.1021/acs.analchem.6b01015.
- (21) Blin, K.; Shaw, S.; Steinke, K.; Villebro, R.; Ziemert, N.; Lee, S. Y.; Medema, M. H.; Weber, T. antiSMASH 5.0: updates to the secondary metabolite genome mining pipeline. *Nucleic acids research* **2019**, DOI: 10.1093/nar/gkz310.
- (22) Graca, A. P.; Calisto, R.; Lage, O. M. Planctomycetes as Novel Source of Bioactive Molecules. *Front. Microbiol.* **2016**, *7*, 1241, DOI: 10.3389/fmicb.2016.01241.
- (23) Neubauer, P. R.; Widmann, C.; Wibberg, D.; Schröder, L.; Frese, M.; Kottke, T.; Kalinowski, J.; Niemann, H. H.; Sewald, N. A flavin-dependent halogenase from metagenomic analysis prefers bromination over chlorination. *PLoS ONE* **2018**, *13*, e0196797, DOI: 10.1371/journal.pone.0196797.
- (24) Neumann, C. S.; Fujimori, D. G.; Walsh, C. T. Halogenation strategies in natural product biosynthesis. *Chem. Biol.* **2008**, *15*, 99–109, DOI: 10.1016/j.chembiol.2008.01.006.
- (25) Zhang, X.; Bruce, T. C. A definitive mechanism for chorismate mutase. *Biochemistry* **2005**, *44*, 10443–10448, DOI: 10.1021/bi050886p.
- (26) Kelley, L. A.; Sternberg, M. J. E. Protein structure prediction on the web: a case study using the phyre server. *Nat. Protoc.* **2009**, *4*, 363–371, DOI: 10.1038/nprot.2009.2.
- (27) Gallagher, D. T.; Mayhew, M.; Holden, M. J.; Howard, A.; Kim, K. J.; Vilker, V. L. The crystal structure of chorismate lyase shows a new fold and a tightly retained product. *Proteins* **2001**, *44*, 304–311.
- (28) Agarwal, V.; Miles, Z. D.; Winter, J. M.; Eustáquio, A. S.; El Gamal, A. A.; Moore, B. S. Enzymatic Halogenation and Dehalogenation Reactions: Pervasive and Mechanistically Diverse. *Chemical reviews* **2017**, *117*, 5619–5674, DOI: 10.1021/acs.chemrev.6b00571.
- (29) Agarwal, V.; Blanton, J. M.; Podell, S.; Taton, A.; Schorn, M. A.; Busch, J.; Lin, Z.; Schmidt, E. W.; Jensen, P. R.; Paul, V. J. *et al.* Metagenomic discovery of polybrominated diphenyl ether biosynthesis by marine sponges. *Nature chemical biology* **2017**, DOI: 10.1038/nchembio.2330.
- (30) Agarwal, V.; El Gamal, A.; Abraham, A.; Yamanaka, K.; Poth, D.; Kersten, R. D.; Schorn, M.; Allen, E. E.; Moore, B. S. Biosynthesis of polybrominated aromatic organic compounds by marine bacteria. *Nat. Chem. Biol.* **2014**, *10*, 640–647, DOI: 10.1038/nchembio.1564.

- (31) Haslinger, K.; Maximowitsch, E.; Brieke, C.; Koch, A.; Cryle, M. J. Cytochrome P450 OxyBtei catalyzes the first phenolic coupling step in teicoplanin biosynthesis. *ChemBioChem* **2014**, *15*, 2719–2728, DOI: 10.1002/cbic.201402441.
- (32) Gaitatzis, N.; Silakowski, B.; Kunze, B.; Nordsiek, G.; Blöcker, H.; Höfle, G.; Müller, R. The biosynthesis of the aromatic myxobacterial electron transport inhibitor stigmatellin is directed by a novel type of modular polyketide synthase. *J. Biol. Chem.* **2002**, *277*, 13082–13090, DOI: 10.1074/jbc.M111738200.
- (33) Aussel, L.; Pierrel, F.; Loiseau, L.; Lombard, M.; Fontecave, M.; Barras, F. Biosynthesis and physiology of coenzyme Q in bacteria. *Biochim. Biophys. Acta* **2014**, *1837*, 1004–1011, DOI: 10.1016/j.bbabbio.2014.01.015.
- (34) Lage, O. M.; Bondoso, J. Planctomycetes and macroalgae, a striking association. *Front. Microbiol.* **2014**, *5*, 267, DOI: 10.3389/fmicb.2014.00267.
- (35) Truckses, D. M.; Garrenton, L. S.; Thorner, J. Jekyll and Hyde in the microbial world. *Science* **2004**, *306*, 1509–1511.
